# Supplementary material
Source: PubMed Central journal article supplement (PMC3567813)
Supplement: cr2012170x1.pdf [file cr2012170x1.pdf]

## Supplementary Information

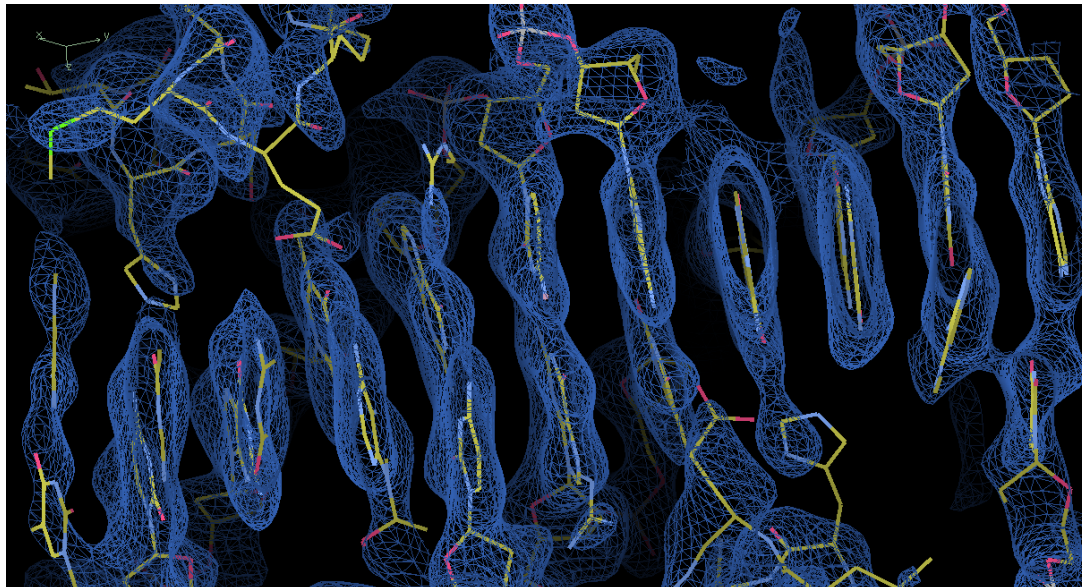

**Figure S1.** The  $2F_o - F_c$  electron density map of DNA (contoured at  $1.5 \sigma$ ) calculated from the molecular replacement solution.
