# Supplementary material
Source: PubMed Central journal article supplement (PMC3567813)
Supplement: cr2012170x5.pdf [file cr2012170x5.pdf]

**Table S1 Summary of ITC data**

| <b>Titration of CLOCK bHLH domain into BMAL1 bHLH domain</b>                                    |                                      |                              |                 |                                   |                            |
|-------------------------------------------------------------------------------------------------|--------------------------------------|------------------------------|-----------------|-----------------------------------|----------------------------|
| Sample in cell                                                                                  | Sample in syringe                    | $K_D \pm$ s.d.<br>( $\mu$ M) | N               | $\Delta H \pm$ s.d.<br>(kcal/mol) | - $\Delta S$<br>(kcal/mol) |
| CLOCK                                                                                           | BMAL1                                | 0.37 $\pm$ 0.13              | 1.09 $\pm$ 0.01 | -5.37 $\pm$ 0.09                  | -3.40                      |
| CLOCK (F50M)                                                                                    | BMAL1                                | 0.33 $\pm$ 0.08              | 0.96 $\pm$ 0.01 | -7.18 $\pm$ 0.09                  | -1.65                      |
| CLOCK                                                                                           | BMAL1 (M88F)                         | 0.27 $\pm$ 0.08              | 0.93 $\pm$ 0.01 | -6.27 $\pm$ 0.09                  | -2.69                      |
| CLOCK (H84L)                                                                                    | BMAL1                                | 56.18 $\pm$ 10.79            | 0.11 $\pm$ 0.06 | 13.46 $\pm$ 7.60                  | -19.25                     |
| CLOCK                                                                                           | BMAL1 (L125H)                        | 64.94 $\pm$ 30.37            | 2.49 $\pm$ 0.19 | 1.20 $\pm$ 0.08                   | -6.91                      |
| <b>Titration of CLOCK and BMAL1 bHLH homo- / heterodimer in to WT E-box DNA</b>                 |                                      |                              |                 |                                   |                            |
| Protein                                                                                         |                                      | $K_D \pm$ s.d.<br>( $\mu$ M) | N               | $\Delta H \pm$ s.d.<br>(kcal/mol) | - $\Delta S$<br>(kcal/mol) |
| CLOCK-CLOCK homodimer                                                                           |                                      | 8.93 $\pm$ 0.48              | 0.95 $\pm$ 0.01 | -18.55 $\pm$ 0.42                 | 11.65                      |
| BMAL1-BMAL1 homodimer                                                                           |                                      | 14.49 $\pm$ 1.92             | 0.91 $\pm$ 0.04 | -4.65 $\pm$ 0.33                  | -1.95                      |
| CLOCK-BMAL1 heterodimer                                                                         |                                      | 1.52 $\pm$ 0.10              | 0.82 $\pm$ 0.01 | -15.96 $\pm$ 0.18                 | 8.02                       |
| <b>Titration of CLOCK-BMAL1 bHLH domains into WT E-box DNA in the presence of NAD cofactors</b> |                                      |                              |                 |                                   |                            |
| NAD cofactors<br>(10 mM)                                                                        |                                      | $K_D \pm$ s.d.<br>( $\mu$ M) | N               | $\Delta H \pm$ s.d.<br>(kcal/mol) | - $\Delta S$<br>(kcal/mol) |
| NAD <sup>+</sup>                                                                                |                                      | 1.18 $\pm$ 0.01              | 0.82 $\pm$ 0.01 | -13.32 $\pm$ 0.01                 | 5.24                       |
| NADH                                                                                            |                                      | 2.13 $\pm$ 0.27              | 0.86 $\pm$ 0.01 | -12.57 $\pm$ 0.31                 | 4.83                       |
| NADP <sup>+</sup>                                                                               |                                      | 2.54 $\pm$ 0.11              | 0.87 $\pm$ 0.01 | -12.76 $\pm$ 0.12                 | 5.13                       |
| NADPH                                                                                           |                                      | 2.74 $\pm$ 0.16              | 0.88 $\pm$ 0.01 | -12.04 $\pm$ 0.15                 | 4.44                       |
| <b>Titration of CLOCK-BMAL1 bHLH domains into tandem E-boxes DNA</b>                            |                                      |                              |                 |                                   |                            |
| DNA name                                                                                        | DNA sequence<br>(33bp)               | $K_D \pm$ s.d.<br>( $\mu$ M) | N               | $\Delta H \pm$ s.d.<br>(kcal/mol) | - $\Delta S$<br>(kcal/mol) |
| Dbpl2wt                                                                                         | GAGTTGCACATTCCTC<br>GCCACGTGAGTGGTAC | 1.42 $\pm$ 0.06              | 0.88 $\pm$ 0.01 | -12.47 $\pm$ 0.08                 | 4.50                       |
| Dbpl2sp10                                                                                       | GTGCACATTCCTAGTCG<br>CCACGTGAGTGGTAC | 1.23 $\pm$ 0.07              | 0.85 $\pm$ 0.01 | -12.47 $\pm$ 0.11                 | 4.41                       |

| Titration of CLOCK-BMAL1 bHLH domains into WT or single-mutated E-box DNA |                            |                              |                 |                                   |                            |
|---------------------------------------------------------------------------|----------------------------|------------------------------|-----------------|-----------------------------------|----------------------------|
| DNA name                                                                  | DNA sequence<br>(16bp)     | $K_D \pm$ s.d.<br>( $\mu$ M) | N               | $\Delta H \pm$ s.d.<br>(kcal/mol) | - $\Delta S$<br>(kcal/mol) |
| WT                                                                        | AGGAAC <u>CACGTG</u> ACCCA | 1.52 $\pm$ 0.10              | 0.82 $\pm$ 0.01 | -15.96 $\pm$ 0.18                 | 8.02                       |
| 1CAAd                                                                     | AGGAA <u>A</u> ACGTGACCCA  | 4.44 $\pm$ 0.24              | 0.83 $\pm$ 0.01 | -10.83 $\pm$ 0.15                 | 3.52                       |
| 1CTz                                                                      | AGGAA <u>T</u> ACGTGACCCA  | ND                           | ND              | ND                                | ND                         |
| 1CGd                                                                      | AGGAA <u>G</u> ACGTGACCCA  | ND                           | ND              | ND                                | ND                         |
| 2AGz                                                                      | AGGAA <u>C</u> GCGTGACCCA  | 8.70 $\pm$ 1.03              | 1.05 $\pm$ 0.03 | -2.87 $\pm$ 0.12                  | -4.05                      |
| 2ATd                                                                      | AGGAA <u>CT</u> CGTGACCCA  | 11.35 $\pm$ 2.06             | 1.20 $\pm$ 0.04 | -2.21 $\pm$ 0.13                  | -4.53                      |
| 2ACd                                                                      | AGGAA <u>CC</u> CGTGACCCA  | 11.26 $\pm$ 1.08             | 1.30 $\pm$ 0.02 | -2.01 $\pm$ 0.07                  | -4.74                      |
| 3CTz                                                                      | AGGAA <u>CA</u> TGTGACCCA  | 5.52 $\pm$ 0.49              | 0.75 $\pm$ 0.02 | -9.74 $\pm$ 0.31                  | 2.57                       |
| 3CAAd                                                                     | AGGAA <u>CA</u> AGTGACCCA  | ND                           | ND              | ND                                | ND                         |
| 3CGd                                                                      | AGGAA <u>CA</u> GGTGACCCA  | ND                           | ND              | ND                                | ND                         |
| 4GAz                                                                      | AGGAA <u>CAC</u> ATGACCCA  | ND                           | ND              | ND                                | ND                         |
| 5TCz                                                                      | AGGAA <u>CACG</u> CGACCCA  | 14.99 $\pm$ 3.50             | 0.99 $\pm$ 0.07 | -3.27 $\pm$ 0.37                  | -3.31                      |
| 5TAd                                                                      | AGGAA <u>CACG</u> AGACCCA  | 12.66 $\pm$ 2.16             | 0.94 $\pm$ 0.05 | -3.81 $\pm$ 0.31                  | -2.87                      |
| 5TGd                                                                      | AGGAA <u>CACG</u> GGACCCA  | 21.32 $\pm$ 12.91            | 1.62 $\pm$ 0.13 | -1.37 $\pm$ 0.24                  | ND                         |
| 6GAz                                                                      | AGGAA <u>CACGT</u> AACCCA  | ND                           | ND              | ND                                | ND                         |
| 6GTd                                                                      | AGGAA <u>CACGT</u> TACCCA  | ND                           | ND              | ND                                | ND                         |
| 6GCd                                                                      | AGGAA <u>CACGT</u> CACCCA  | ND                           | ND              | ND                                | ND                         |
| 7ATd                                                                      | AGGAA <u>CACGTG</u> TCCCA  | 2.57 $\pm$ 0.17              | 0.78 $\pm$ 0.01 | -16.64 $\pm$ 0.22                 | 9.00                       |

ND, not detected.

The six bp E-box sequences are underlined.

The single-mutated nucleotides different from WT 16 bp canonical E-box DNA are in red.
